# Supplementary material for: Sustained inhibition of progressive joint damage with rituximab plus methotrexate in early active rheumatoid arthritis: 2-year results from the randomised controlled trial IMAGE
Source: PubMed Central journal article supplement — Ann Rheum Dis. 2011 Oct 19;71(3):351–7. doi: 10.1136/annrheumdis-2011-200170 (PMC3277723; doi:10.1136/annrheumdis-2011-200170), 2011-10-19
Supplement: ard-71-3-0351-s1.pdf [file ard-71-3-0351-s1.pdf]

**Supplementary table S1: Comparison of radiographic and clinical efficacy responses to rituximab 2x500 mg +MTX versus rituximab 2x1000 mg +MTX at weeks 52 or 104**

| <b>Outcome</b>                 | <b>Rituximab<br/>2×500 mg<br/>+ MTX</b> | <b>Rituximab<br/>2×1000 mg<br/>+ MTX</b> | <b>Ex-p value</b> |
|--------------------------------|-----------------------------------------|------------------------------------------|-------------------|
| <b>Screening to week 52</b>    |                                         |                                          |                   |
| <b>Radiographic (mITT)</b>     |                                         |                                          |                   |
| Change in mTSS                 | 0.60                                    | 0.34                                     | 0.0762            |
| Change in total erosion score  | 0.40                                    | 0.19                                     | 0.0832            |
| Change in JSN score            | 0.19                                    | 0.14                                     | 0.4058            |
| <b>Disease activity (ITT)</b>  |                                         |                                          |                   |
| ACR20                          | 76.7%                                   | 80.0%                                    | 0.3513            |
| ACR50                          | 59.4%                                   | 64.8%                                    | 0.1858            |
| ACR70                          | 42.2%                                   | 46.8%                                    | 0.2642            |
| ACR90                          | 17.3%                                   | 16.4%                                    | 0.8046            |
| ACRn                           | 41.49                                   | 45.05                                    | 0.3164            |
| EULAR good response            | 39.8%                                   | 42.8%                                    | 0.4580            |
| DAS28 LDA                      | 40.2%                                   | 42.8%                                    | 0.4974            |
| DAS28 remission                | 25.3%                                   | 30.4%                                    | 0.1867            |
| <b>Physical function (ITT)</b> |                                         |                                          |                   |
| HAQ-DI decrease 0.22           | 86.7%                                   | 86.8%                                    | 0.9357            |
| <b>Screening to week 104</b>   |                                         |                                          |                   |
| <b>Radiographic (mITT)</b>     |                                         |                                          |                   |
| Change in mTSS                 | 0.76                                    | 0.41                                     | 0.1216            |
| Change in total erosion score  | 0.50                                    | 0.23                                     | 0.1125            |
| Change in JSN score            | 0.26                                    | 0.18                                     | 0.5156            |
| <b>Disease activity (ITT)</b>  |                                         |                                          |                   |

|                     |       |       |        |
|---------------------|-------|-------|--------|
| ACR20               | 74.7% | 74.0% | 0.8480 |
| ACR50               | 59.8% | 62.4% | 0.5481 |
| ACR70               | 42.2% | 46.4% | 0.3279 |
| ACR90               | 20.5% | 23.2% | 0.4611 |
| ACRn                | 44.80 | 47.75 | 0.4486 |
| EULAR good response | 44.2% | 47.6% | 0.4490 |
| DAS28 LDA           | 44.6% | 47.6% | 0.4831 |
| DAS28 remission     | 33.7% | 32.0% | 0.6863 |

**Physical function (ITT)**

|                             |       |       |        |
|-----------------------------|-------|-------|--------|
| HAQ-DI decrease $\geq 0.22$ | 83.1% | 85.2% | 0.4819 |
|-----------------------------|-------|-------|--------|

---

p values are for comparison of 2x500 mg + MTX vs. 2x1000 mg + MTX . All p values are exploratory/descriptive.

mTSS, total erosion score and joint space narrowing score were tested using the Van-Elteren test adjusted for the stratification factors (RF status, region) applied at randomisation. ACRn, DAS28 and HAQ-DI were tested using analysis of variance model adjusted for baseline stratification factors and baseline values for DAS28 and HAQ-DI; Cochran–Mantel–Haenszel test for categorical variables. Linear extrapolation has been used on radiographic endpoints, last observation carried forward or non-responder imputation has been used on other endpoints. ACRn, American College of Rheumatology index of improvement in rheumatoid arthritis; DAS28, Disease Activity Score in 28 joints; EULAR, European League Against Rheumatism; HAQ-DI, Health Assessment Questionnaire-Disability Index; JSN, joint space narrowing; LDA, low disease activity; MTX, methotrexate; mTSS, total Genant-modified Sharp score.

**Supplementary table S2: Subgroup analysis in patients**

**seropositive or seronegative for RF and/or ACPA**

| Outcome                                                               | Placebo +<br>MTX | Rituximab<br>2x500 mg<br>+ MTX | Rituximab<br>2x1000 mg<br>+ MTX |
|-----------------------------------------------------------------------|------------------|--------------------------------|---------------------------------|
| <b>Probability of no radiographic progression, OR (95% CI) (mITT)</b> |                  |                                |                                 |

---

|                             |               |               |
|-----------------------------|---------------|---------------|
| RF and/or ACPA seropositive | 1.737         | 2.228         |
|                             | (1.182–2.554) | (1.513–3.281) |
| RF and ACPA seronegative    | 0.900         | 1.833         |
|                             | (0.263–3.075) | (0.558–6.027) |

**ACR50, % (ITT)**

|                             |    |      |      |
|-----------------------------|----|------|------|
| RF and/or ACPA seropositive | 38 | 61** | 65** |
| RF and ACPA seronegative    | 64 | 46   | 42   |

---

\*\*Ex-p<0.0001 vs placebo + MTX. All p values are exploratory/descriptive.

RF and/or ACPA seropositive group mITT and ITT (rituximab 2x500 mg + MTX, 2x1000 mg + MTX, placebo): n=219, 218, 212 and 227, 224, 227, respectively (total number of patients in the rituximab 1000 mg autoantibody subgroups differed because two patients could not be classified [seronegative for RF but no ACPA data, so unable to assign to either group]). RF and ACPA seronegative group mITT and ITT (rituximab 2x500 mg + MTX, 2x1000mg + MTX, placebo): n=20, 24, 21 and 22, 24, 22, respectively. OR of probability of no radiographic progression for rituximab relative to placebo. ACPA, anti-citrullinated peptide antibody; ACR, American College of Rheumatology; CI, confidence interval; MTX, methotrexate; OR, odds ratio; RF, rheumatoid factor.
